# Supplementary material for: Plasma membrane imaging with a fluorescent benzothiadiazole derivative
Source: PubMed Central journal article supplement (PMC6880836; doi:10.3762/bjoc.15.257), 2019-11-06
Supplement: Beilstein_J_Org_Chem-15-2644-s001.pdf [file Beilstein_J_Org_Chem-15-2644-s001.pdf]

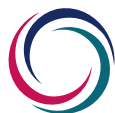

## Supporting Information

for

### **Plasma membrane imaging with a fluorescent benzothiadiazole derivative**

Pedro H. P. R. Carvalho, Jose R. Correa, Karen L. R. Paiva, Daniel F. S. Machado,  
Jackson D. Scholten and Brenno A. D. Neto

*Beilstein J. Org. Chem.* **2019**, *15*, 2644–2654. [doi:10.3762/bjoc.15.257](https://doi.org/10.3762/bjoc.15.257)

**Copies of spectra, additional figures, energies and Cartesian  
coordinates for all calculated structures**

## Table of contents

|                                                   |              |
|---------------------------------------------------|--------------|
| Figure S1                                         | Page S2      |
| Figure S2                                         | Page S2      |
| Figure S3                                         | Page S3      |
| Figure S4                                         | Page S3      |
| Figure S5                                         | Page S4      |
| Figure S6                                         | Page S4      |
| Figure S7                                         | Page S5      |
| Figure S8                                         | Page S5      |
| Cartesian coordinates of the calculated structure | Pages S6–S14 |

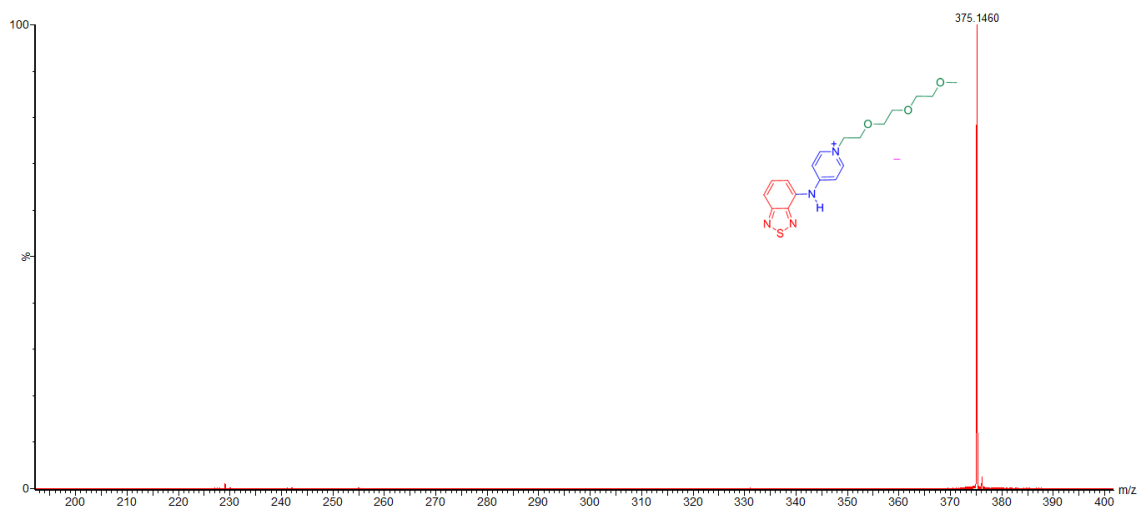

**Figure S1:** High Resolution ESI(+)-QTOF product ion spectrum of BTD-4APTEG.

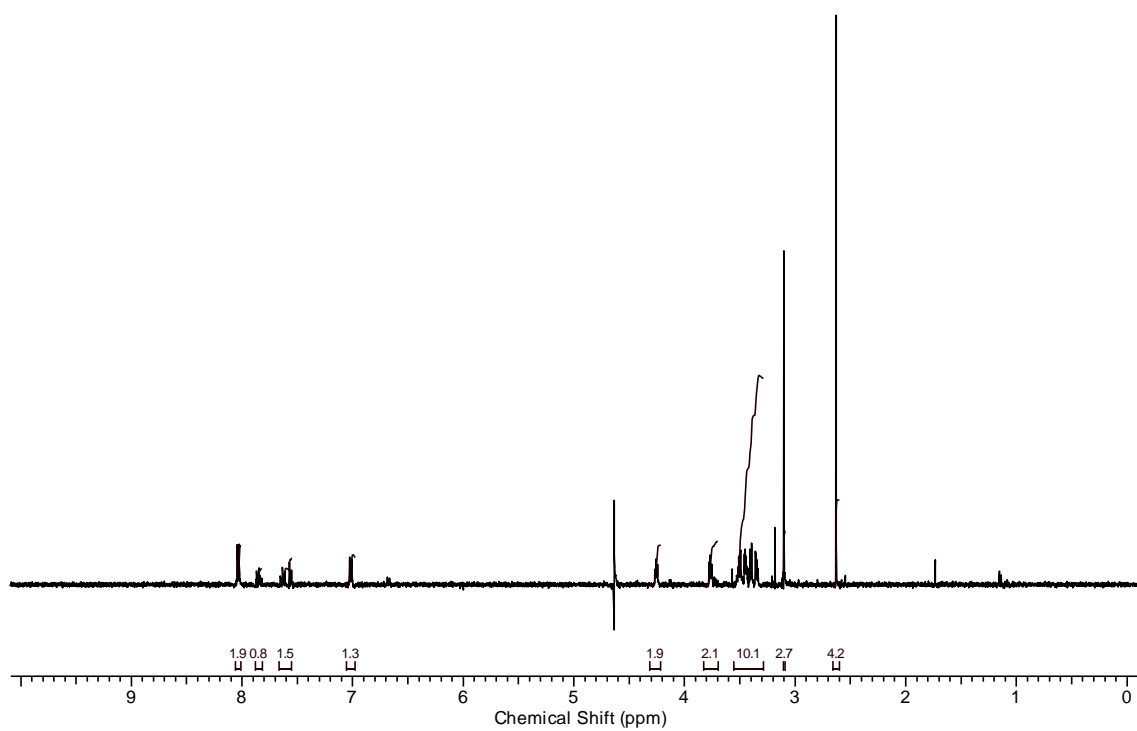

**Figure S2:**  $^1\text{H}$  NMR (400 MHz,  $\text{D}_2\text{O}$ ) of BTD-4APTEG.

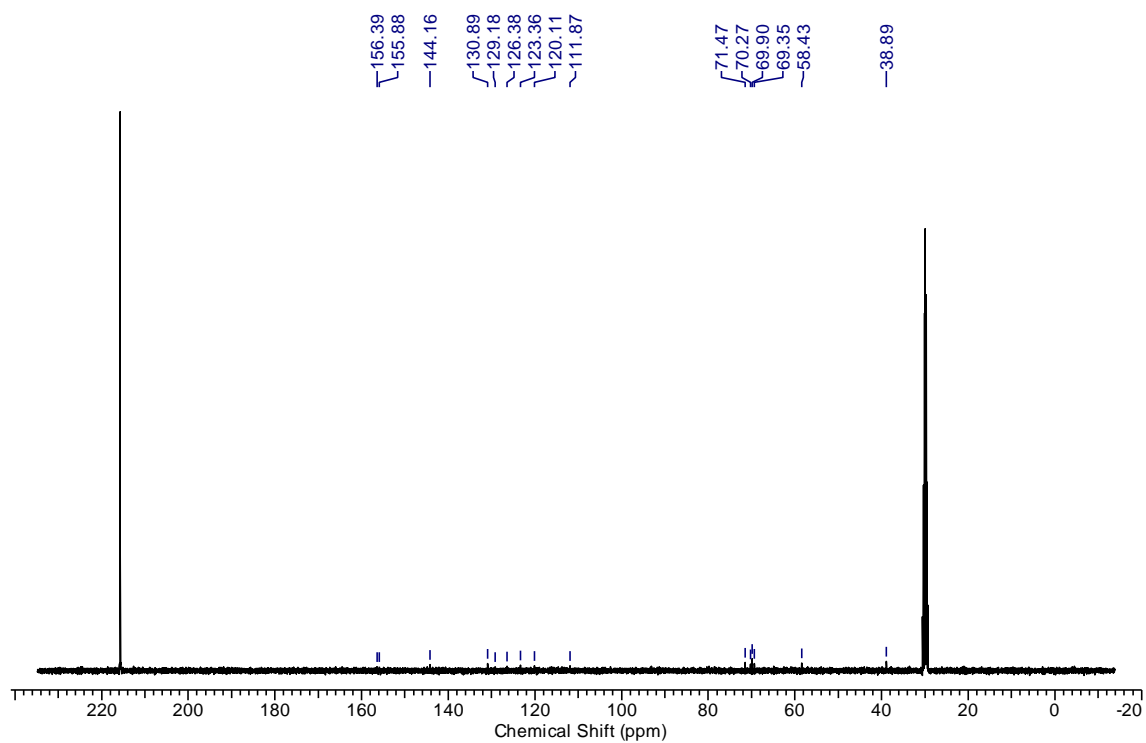

**Figure S3:**  $^{13}\text{C}$  NMR (100 MHz,  $\text{D}_2\text{O}/\text{acetone-}d_6$ ) of BTD-4APTEG. Deuterated acetone was used to set the scale.

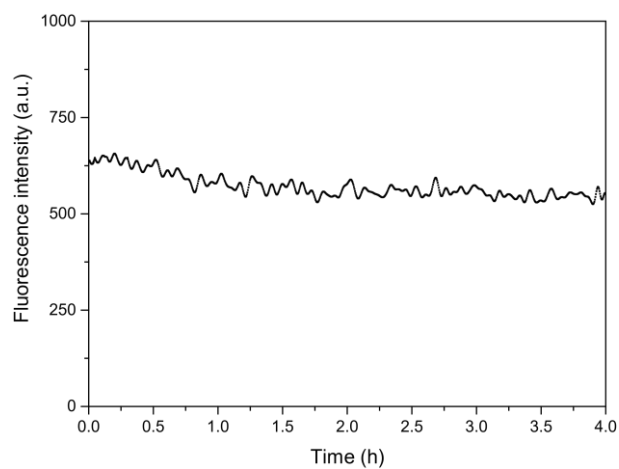

**Figure S4:** Photostability of BTD-4APTEG acquired at room temperature upon excitation at 254 nm while monitoring the emission at 543 nm. Time-dependence of photoluminescence intensity was carried out with a Xe lamp (400 W).

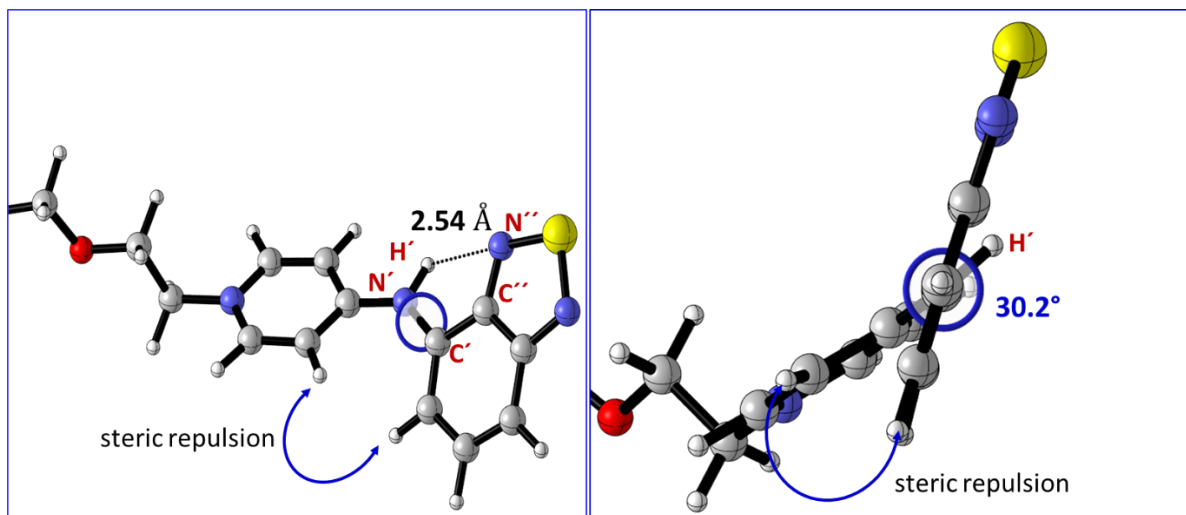

**Figure S5:** Newman projection of the optimized geometry of BTD-4APTEG in DMSO indicating the distance (black dotted line) between the H' and the N'' atoms and the H'-N'-C'-C'' dihedral angle (blue circle). Results obtained at the CAM-B3LYP/6-311+G(d) level of theory.

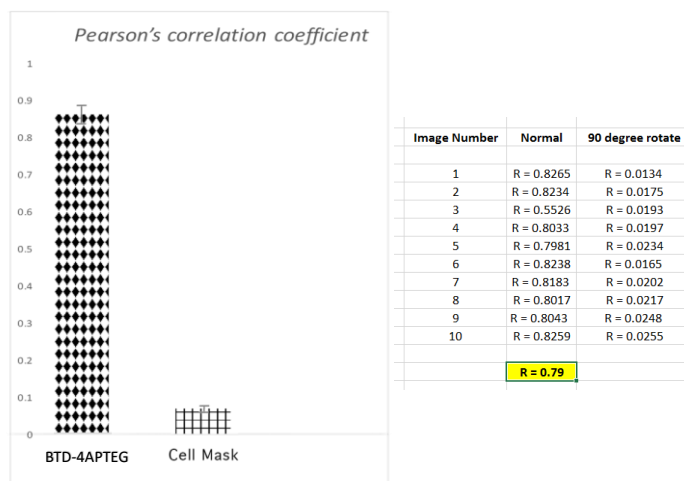

**Figure S6:** PCC from MCF-7 live cells samples (from ten different images) stained with BTD-4APTEG (green emission) and CellMask (red emission). (Left) Pearson's correlation coefficient of the images with respectively negative controls. (Right) Normal PCC values (average highlighted in yellow) and 90° counterclockwise rotation.

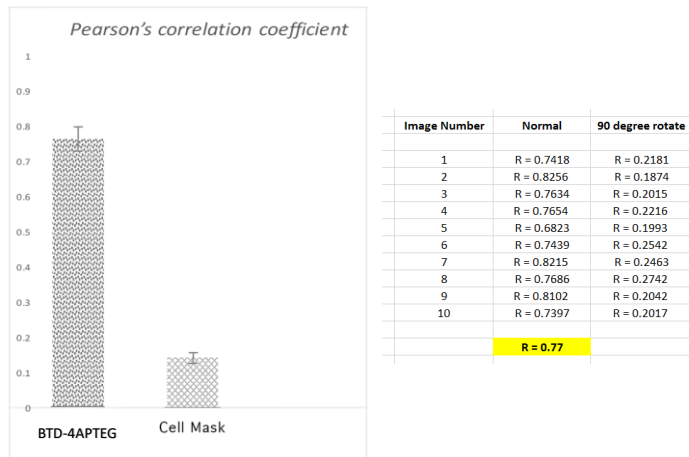

**Figure S7:** PCC from MCF-7 fixed cells samples (from ten different images) stained with BTD-4APTEG (green emission) and CellMask (red emission). (Left) Pearson's correlation coefficient of the images with respectively negative controls. (Right) Normal PCC values (average highlighted in yellow) and 90° counterclockwise rotation.

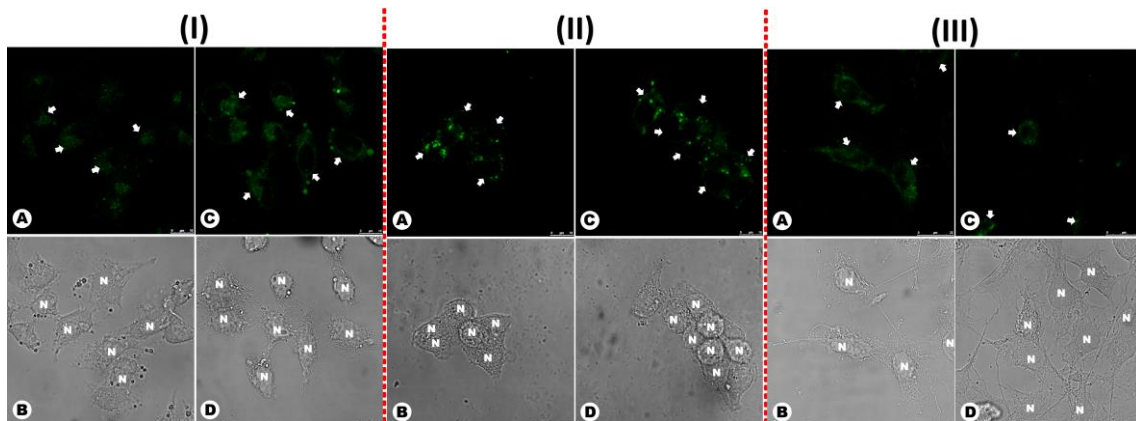

**Figure S8:** Fluorescent profile of different cell lines incubated with BTD-4APTEG (1  $\mu$ M) in live (A) and (B) and fixed cells (C) and (D). (I) A2780, (II) T47D and (III) HUVEC cell lines. The dye was found accumulated in the peripheral region of the cellular membrane (white arrows) in both samples. The nuclei in these images are represented by black voids indicated by the letter N. (B) and (D) Show the normal morphological aspects of the samples by phase contrast microscopy. Scale bar of 10  $\mu$ m.

**Cartesian coordinates of the optimized BTD-4APTEG obtained at the CAM-B3LYP/6-31G(d) level of theory.**

---

Energy = -1542.16173568 E<sub>h</sub>

Charge = 1

Multiplicity = 1

Solvent = acetonitrile

---

|   |             |             |             |
|---|-------------|-------------|-------------|
| C | 5.88900600  | -0.59196100 | 0.03641500  |
| C | 6.96458200  | -0.72111200 | -0.90423700 |
| C | 7.07064800  | 0.18109700  | -1.99820000 |
| C | 6.13827000  | 1.16501100  | -2.09544300 |
| C | 5.07626100  | 1.31596300  | -1.14999700 |
| C | 4.92119900  | 0.45043900  | -0.10964600 |
| H | 7.87651900  | 0.07794100  | -2.71312200 |
| H | 6.19501500  | 1.88046300  | -2.90682300 |
| H | 4.40631500  | 2.15774800  | -1.26521600 |
| S | 7.21520400  | -2.43686200 | 0.73850600  |
| N | 7.7767700   | -1.73269400 | -0.61227000 |
| N | 5.91624000  | -1.49627200 | 1.00609400  |
| N | 3.92046500  | 0.52878800  | 0.87269100  |
| H | 4.20528600  | 0.20841000  | 1.78879400  |
| C | 2.61763300  | 0.85502400  | 0.73191000  |
| C | 1.81302600  | 0.96685200  | 1.88754700  |
| C | 1.98708500  | 1.07120200  | -0.50994300 |
| C | 0.49802400  | 1.29566100  | 1.77665500  |
| H | 2.23313000  | 0.80778100  | 2.87196600  |
| C | 0.66173000  | 1.38948700  | -0.54851500 |
| H | 2.51793900  | 0.97055800  | -1.44348000 |
| H | -0.13955200 | 1.40478600  | 2.64264400  |
| H | 0.14712300  | 1.55620700  | -1.48447800 |
| C | -1.51048000 | 1.85082400  | 0.48395900  |
| H | -1.65572200 | 2.49975700  | -0.37743900 |

---

|   |              |             |             |
|---|--------------|-------------|-------------|
| H | -1.78387300  | 2.41304700  | 1.37475100  |
| N | -0.07954500  | 1.51601600  | 0.57261200  |
| C | -2.36500800  | 0.59956300  | 0.35826900  |
| H | -2.08626900  | 0.03131100  | -0.53784100 |
| H | -2.22478000  | -0.05292500 | 1.22889600  |
| O | -3.69867300  | 1.03468400  | 0.27355800  |
| C | -4.62369500  | -0.02692000 | 0.13120800  |
| H | -4.56050100  | -0.70428900 | 0.99070100  |
| H | -4.40471900  | -0.60207000 | -0.77586600 |
| C | -6.00578900  | 0.57983500  | 0.04311700  |
| H | -6.06158600  | 1.26565000  | -0.81103900 |
| H | -6.22600900  | 1.15116100  | 0.95311100  |
| O | -6.92700800  | -0.47729600 | -0.11149100 |
| C | -8.26520400  | -0.03609600 | -0.20712300 |
| H | -8.38477100  | 0.63705700  | -1.06480800 |
| H | -8.55192400  | 0.51263200  | 0.69828000  |
| C | -9.14386200  | -1.25483200 | -0.37699800 |
| H | -8.85532200  | -1.80416400 | -1.28220900 |
| H | -9.02325700  | -1.92911300 | 0.48045000  |
| O | -10.47969500 | -0.81342000 | -0.47308100 |
| C | -11.39521600 | -1.87544000 | -0.63694700 |
| H | -12.39109400 | -1.44082500 | -0.70192200 |
| H | -11.18741000 | -2.43768100 | -1.55427200 |
| H | -11.35791800 | -2.56382600 | 0.21483900  |

Energy = -1542.15402740 E<sub>h</sub>

Charge = 1

Multiplicity = 1

Solvent = dichloromethane

|   |            |             |             |
|---|------------|-------------|-------------|
| C | 5.88413200 | -0.59373300 | 0.03802000  |
| C | 6.95882800 | -0.72727800 | -0.90250800 |
| C | 7.07204300 | 0.17834900  | -1.99292800 |
| C | 6.14758300 | 1.16993300  | -2.08729600 |
| C | 5.08607300 | 1.32463100  | -1.14183600 |



---

|   |             |             |             |
|---|-------------|-------------|-------------|
| C | 4.92452600  | 0.45569600  | -0.10554500 |
| H | 7.87810800  | 0.07159500  | -2.70703200 |
| H | 6.21105800  | 1.88844900  | -2.89548100 |
| H | 4.42229400  | 2.17207100  | -1.25274400 |
| S | 7.19751100  | -2.44892400 | 0.73464000  |
| N | 7.76459000  | -1.74537800 | -0.61341200 |
| N | 5.90458300  | -1.50045900 | 1.00569900  |
| N | 3.92303100  | 0.53823600  | 0.87746200  |
| H | 4.20668600  | 0.21376800  | 1.79261900  |
| C | 2.62114200  | 0.86199900  | 0.73413600  |
| C | 1.81272500  | 0.97455000  | 1.88776000  |
| C | 1.99275100  | 1.07686400  | -0.50981200 |
| C | 0.49785000  | 1.30179700  | 1.77312000  |
| H | 2.23085400  | 0.81824500  | 2.87355700  |
| C | 0.66696700  | 1.39218100  | -0.55182400 |
| H | 2.52719300  | 0.97616100  | -1.44144700 |
| H | -0.14146800 | 1.41256400  | 2.63777000  |
| H | 0.15354600  | 1.55603700  | -1.48910100 |
| C | -1.50940700 | 1.85052800  | 0.47461800  |
| H | -1.65503200 | 2.49429700  | -0.39055100 |
| H | -1.78590500 | 2.41809900  | 1.36109800  |
| N | -0.07771400 | 1.51926000  | 0.56733800  |
| C | -2.36277200 | 0.59760600  | 0.35518200  |
| H | -2.08272800 | 0.02445500  | -0.53785700 |
| H | -2.22092600 | -0.05084600 | 1.22911400  |
| O | -3.69471400 | 1.03222000  | 0.26875600  |
| C | -4.62197000 | -0.02858700 | 0.12948400  |
| H | -4.55959900 | -0.70393300 | 0.99055700  |
| H | -4.40468200 | -0.60623200 | -0.77637700 |
| C | -6.00331500 | 0.57967900  | 0.04063300  |
| H | -6.05756200 | 1.26533100  | -0.81392800 |
| H | -6.22248900 | 1.15254400  | 0.95008700  |
| O | -6.92374600 | -0.47683700 | -0.11307800 |

---

---

|   |              |             |             |
|---|--------------|-------------|-------------|
| C | -8.26248300  | -0.03660600 | -0.20649900 |
| H | -8.38434600  | 0.63702000  | -1.06348600 |
| H | -8.54878400  | 0.51107400  | 0.69963400  |
| C | -9.14078900  | -1.25556700 | -0.37602400 |
| H | -8.85327800  | -1.80362600 | -1.28249000 |
| H | -9.01719400  | -1.93090500 | 0.48035300  |
| O | -10.47593200 | -0.81382300 | -0.46841200 |
| C | -11.39251700 | -1.87383800 | -0.63302200 |
| H | -12.38794800 | -1.43777500 | -0.69448000 |
| H | -11.18792600 | -2.43401400 | -1.55254500 |
| H | -11.35455100 | -2.56490000 | 0.21678800  |

---

Energy = -1542.16236356 E<sub>h</sub>

Charge = 1

Multiplicity = 1

Solvent = DMSO

---

|   |            |             |             |
|---|------------|-------------|-------------|
| C | 5.88941100 | -0.59179200 | 0.03629100  |
| C | 6.96503900 | -0.72070700 | -0.90438000 |
| C | 7.07046000 | 0.18104000  | -1.99878600 |
| C | 6.13738700 | 1.16426200  | -2.09641300 |
| C | 5.07534900 | 1.31502400  | -1.15097500 |
| C | 4.92088500 | 0.44996400  | -0.11012900 |
| H | 7.87630200 | 0.07809100  | -2.71377700 |
| H | 6.19353000 | 1.87932000  | -2.90818000 |
| H | 4.40484800 | 2.15628000  | -1.26669500 |
| S | 7.21673600 | -2.43568600 | 0.73910600  |
| N | 7.77877400 | -1.73167500 | -0.61202800 |
| N | 5.91725800 | -1.49573800 | 1.00628400  |
| N | 3.92024800 | 0.52808000  | 0.87217000  |
| H | 4.20518700 | 0.20810600  | 1.78836700  |
| C | 2.61733400 | 0.85453300  | 0.73163400  |
| C | 1.81309600 | 0.96635600  | 1.88746700  |
| C | 1.98655700 | 1.07077400  | -0.51002500 |
| C | 0.49807900 | 1.29528700  | 1.77693100  |

---

---

|   |              |             |             |
|---|--------------|-------------|-------------|
| H | 2.23340400   | 0.80708100  | 2.87175800  |
| C | 0.66123700   | 1.38931100  | -0.54826500 |
| H | 2.51706200   | 0.97008200  | -1.44374100 |
| H | -0.13933300  | 1.40428400  | 2.64304400  |
| H | 0.14649300   | 1.55623400  | -1.48410500 |
| C | -1.51058900  | 1.85090400  | 0.48478500  |
| H | -1.65584100  | 2.50028300  | -0.37627800 |
| H | -1.78371200  | 2.41264800  | 1.37596000  |
| N | -0.07970600  | 1.51583600  | 0.57305000  |
| C | -2.36517900  | 0.59976100  | 0.35857900  |
| H | -2.08653100  | 0.03192100  | -0.53778400 |
| H | -2.22506500  | -0.05305300 | 1.22893300  |
| O | -3.69899800  | 1.03489300  | 0.27400500  |
| C | -4.62381800  | -0.02679300 | 0.13140400  |
| H | -4.56055000  | -0.70432000 | 0.99077300  |
| H | -4.40468600  | -0.60173900 | -0.77576300 |
| C | -6.00598100  | 0.57982200  | 0.04335800  |
| H | -6.06190800  | 1.26562900  | -0.81078300 |
| H | -6.22629800  | 1.15104000  | 0.95338100  |
| O | -6.92725600  | -0.47737000 | -0.11130500 |
| C | -8.26540600  | -0.03609700 | -0.20718600 |
| H | -8.38475400  | 0.63696500  | -1.06497300 |
| H | -8.55218300  | 0.51277500  | 0.69811600  |
| C | -9.14409100  | -1.25482200 | -0.37703900 |
| H | -8.85544000  | -1.80432300 | -1.28210000 |
| H | -9.02377000  | -1.92896000 | 0.48054600  |
| O | -10.47997300 | -0.81342900 | -0.47350200 |
| C | -11.39541600 | -1.87561600 | -0.63726600 |
| H | -12.39132100 | -1.44111000 | -0.70259800 |
| H | -11.18731800 | -2.43809200 | -1.55436200 |
| H | -11.35821300 | -2.56372200 | 0.21473100  |

---

Energy = -1542.16148748 E<sub>h</sub>

Charge = 1

---

---

Multiplicity = 1

Solvent = methanol

---

|   |             |             |             |
|---|-------------|-------------|-------------|
| C | 5.88884500  | -0.59202700 | 0.03646500  |
| C | 6.96440100  | -0.72127800 | -0.90417900 |
| C | 7.07071900  | 0.18110600  | -1.99797500 |
| C | 6.13861400  | 1.16529000  | -2.09507300 |
| C | 5.07661600  | 1.31632300  | -1.14962400 |
| C | 4.92132100  | 0.45062500  | -0.10946100 |
| H | 7.87660000  | 0.07786300  | -2.71286900 |
| H | 6.19559400  | 1.88089100  | -2.90630600 |
| H | 4.40688700  | 2.15831400  | -1.26465200 |
| S | 7.21460100  | -2.43731900 | 0.73828200  |
| N | 7.77724400  | -1.73310000 | -0.61235800 |
| N | 5.91584000  | -1.49647500 | 1.00602700  |
| N | 3.92055100  | 0.52907200  | 0.87289200  |
| H | 4.20532700  | 0.20854000  | 1.78895900  |
| C | 2.61775100  | 0.85522200  | 0.73201600  |
| C | 1.81300000  | 0.96705800  | 1.88757600  |
| C | 1.98729100  | 1.07137000  | -0.50991400 |
| C | 0.49800500  | 1.29581900  | 1.77654400  |
| H | 2.23302500  | 0.80807200  | 2.87204500  |
| C | 0.66192300  | 1.38955500  | -0.54861600 |
| H | 2.51828100  | 0.97074000  | -1.44338100 |
| H | -0.13963600 | 1.40499700  | 2.64248500  |
| H | 0.14736800  | 1.55619100  | -1.48462800 |
| C | -1.51043700 | 1.85079500  | 0.48363200  |
| H | -1.65567700 | 2.49955000  | -0.37789900 |
| H | -1.78393600 | 2.41320900  | 1.37427200  |
| N | -0.07948100 | 1.51609200  | 0.57243700  |
| C | -2.36493900 | 0.59948800  | 0.35815000  |
| H | -2.08616400 | 0.03106900  | -0.53786000 |
| H | -2.22466600 | -0.05287000 | 1.22888600  |
| O | -3.69854400 | 1.03460200  | 0.27338300  |

---

---

|   |              |             |             |
|---|--------------|-------------|-------------|
| C | -4.62364400  | -0.02697100 | 0.13113200  |
| H | -4.56048000  | -0.70427500 | 0.99067600  |
| H | -4.40472900  | -0.60220200 | -0.77590300 |
| C | -6.00571200  | 0.57983900  | 0.04302200  |
| H | -6.06145800  | 1.26565400  | -0.81114400 |
| H | -6.22589400  | 1.15121100  | 0.95300200  |
| O | -6.92690900  | -0.47726900 | -0.11156100 |
| C | -8.26512300  | -0.03609800 | -0.20710000 |
| H | -8.38477300  | 0.63708500  | -1.06475000 |
| H | -8.55182100  | 0.51258100  | 0.69833800  |
| C | -9.14377100  | -1.25483900 | -0.37697700 |
| H | -8.85527100  | -1.80411200 | -1.28224200 |
| H | -9.02305600  | -1.92917000 | 0.48042300  |
| O | -10.47958400 | -0.81341800 | -0.47291800 |
| C | -11.39513600 | -1.87537400 | -0.63681700 |
| H | -12.39100200 | -1.44071400 | -0.70165900 |
| H | -11.18744300 | -2.43752900 | -1.55422800 |
| H | -11.35780400 | -2.56386400 | 0.21489100  |

---

Energy = -1542.16317686 E<sub>h</sub>

Charge = 1

Multiplicity = 1

Solvent = water

---

|   |            |             |             |
|---|------------|-------------|-------------|
| C | 5.88994800 | -0.59156000 | 0.03613300  |
| C | 6.96563200 | -0.72019800 | -0.90457000 |
| C | 7.07019100 | 0.18089300  | -1.99959600 |
| C | 6.13619500 | 1.16319600  | -2.09776200 |
| C | 5.07412600 | 1.31373900  | -1.15233600 |
| C | 4.92046600 | 0.44933500  | -0.11079700 |
| H | 7.87599000 | 0.07819300  | -2.71467900 |
| H | 6.19153600 | 1.87769900  | -2.91007100 |
| H | 4.40288300 | 2.15428200  | -1.26875100 |
| S | 7.21877100 | -2.43408700 | 0.73996600  |
| N | 7.78022000 | -1.73033800 | -0.61167600 |

---

---

|   |             |             |             |
|---|-------------|-------------|-------------|
| N | 5.91861700  | -1.49498000 | 1.00657800  |
| N | 3.91996500  | 0.52717400  | 0.87145900  |
| H | 4.20507000  | 0.20775500  | 1.78778600  |
| C | 2.61694400  | 0.85390800  | 0.73125000  |
| C | 1.81320300  | 0.96575600  | 1.88734800  |
| C | 1.98585000  | 1.07019400  | -0.51015200 |
| C | 0.49816400  | 1.29484200  | 1.77728500  |
| H | 2.23378800  | 0.80624200  | 2.87147000  |
| C | 0.66057500  | 1.38905900  | -0.54794900 |
| H | 2.51588400  | 0.96940600  | -1.44410600 |
| H | -0.13902700 | 1.40369100  | 2.64356300  |
| H | 0.14563900  | 1.55621700  | -1.48362600 |
| C | -1.51073600 | 1.85101100  | 0.48586900  |
| H | -1.65601200 | 2.50096300  | -0.37476200 |
| H | -1.78350200 | 2.41213200  | 1.37754000  |
| N | -0.07992100 | 1.51561000  | 0.57361700  |
| C | -2.36540300 | 0.60001400  | 0.35900700  |
| H | -2.08686900 | 0.03270100  | -0.53767500 |
| H | -2.22543600 | -0.05320600 | 1.22901700  |
| O | -3.69942300 | 1.03515900  | 0.27460200  |
| C | -4.62398100 | -0.02663600 | 0.13168000  |
| H | -4.56061900 | -0.70436200 | 0.99089500  |
| H | -4.40464100 | -0.60132500 | -0.77560300 |
| C | -6.00623000 | 0.57979600  | 0.04368000  |
| H | -6.06232300 | 1.26558100  | -0.81044900 |
| H | -6.22667700 | 1.15088500  | 0.95373400  |
| O | -6.92757900 | -0.47747600 | -0.11104300 |
| C | -8.26566700 | -0.03610400 | -0.20727600 |
| H | -8.38471900 | 0.63681400  | -1.06521800 |
| H | -8.55252500 | 0.51298200  | 0.69787400  |
| C | -9.14439200 | -1.25481600 | -0.37707500 |
| H | -8.85558900 | -1.80456700 | -1.28191700 |
| H | -9.02445900 | -1.92874100 | 0.48071200  |

---

---

|   |              |             |             |
|---|--------------|-------------|-------------|
| O | -10.48033200 | -0.81344100 | -0.47406600 |
| C | -11.39568200 | -1.87584100 | -0.63767900 |
| H | -12.39161800 | -1.44147100 | -0.70350200 |
| H | -11.18719400 | -2.43865200 | -1.55445700 |
| H | -11.35862000 | -2.56355700 | 0.21461400  |

---
